# Supplementary material for: Oscillatory Copper Deposition on Conical Iron Electrodes in a Nonuniform Magnetic Field
Source: MDPI journal article supplement (doi:10.3390/magnetochemistry7040046), 2021-03-28
Supplement: s1 [file s1]

## Supporting information

# "Oscillatory copper deposition on conical iron electrodes in nonuniform magnetic fields"

Giovanni Marinaro<sup>1,2</sup>, Mengyuan Huang<sup>1</sup>, Gerd Mutschke<sup>1</sup>, Xuegeng Yang<sup>2</sup>, and K. Eckert<sup>1,2</sup>

1. Institute of Process Engineering, Technische Universität Dresden, 01069 Dresden, Germany;
2. Institute of Fluid Dynamics, Helmholtz-Zentrum Dresden-Rossendorf (HZDR), 01328 Dresden, Germany;

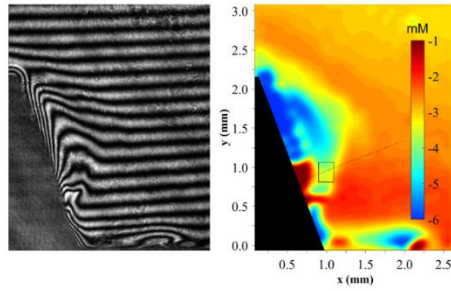

Figure S1.a. Copper deposition on Fe cone (45 Deg): Interferogram and variation of concentration of  $\text{CuSO}_4$  at time= 60.0s. Initial  $\text{CuSO}_4$  concentration=300 mM;  $J=0 \text{ mA/cm}^2$ .

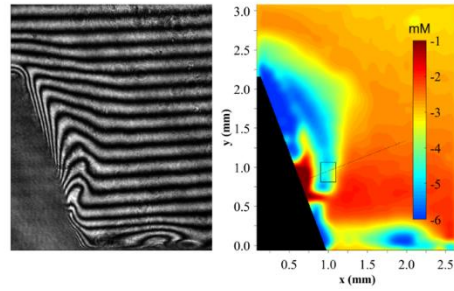

Figure S1.b. Copper deposition on Fe cone (45 Deg): Interferogram and variation of concentration of  $\text{CuSO}_4$  at time= 70.0s. Initial  $\text{CuSO}_4$  concentration=300 mM;  $J=0 \text{ mA/cm}^2$ .

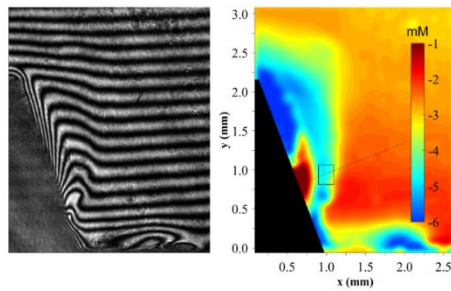

Figure S1.c. Copper deposition on Fe cone (45 Deg): Interferogram and variation of concentration of  $\text{CuSO}_4$  at time= 80.0s. Initial  $\text{CuSO}_4$  concentration=300 mM;  $J=0 \text{ mA/cm}^2$ .

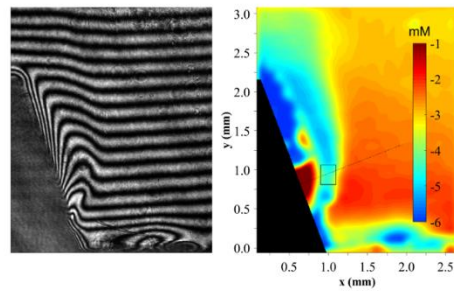

Figure S1.d. Copper deposition on Fe cone (45 Deg): Interferogram and variation of concentration of  $\text{CuSO}_4$  at time= 90.0s. Initial  $\text{CuSO}_4$  concentration=300 mM;  $J=0 \text{ mA/cm}^2$ .

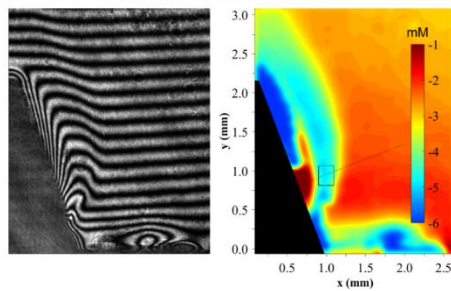

Figure S1.e. Copper deposition on Fe cone (45 Deg): Interferogram and variation of concentration of  $\text{CuSO}_4$  at time= 100.0s. Initial  $\text{CuSO}_4$  concentration=300 mM;  $J=0 \text{ mA/cm}^2$ .

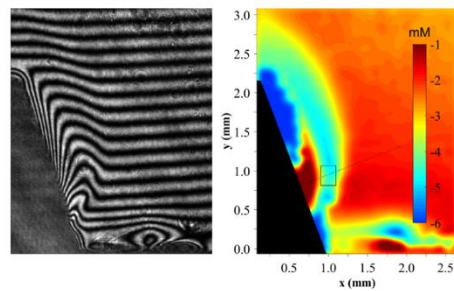

Figure S1.f. Copper deposition on Fe cone (45 Deg): Interferogram and variation of concentration of  $\text{CuSO}_4$  at time= 110.0s. Initial  $\text{CuSO}_4$  concentration=300 mM;  $J=0 \text{ mA/cm}^2$ .

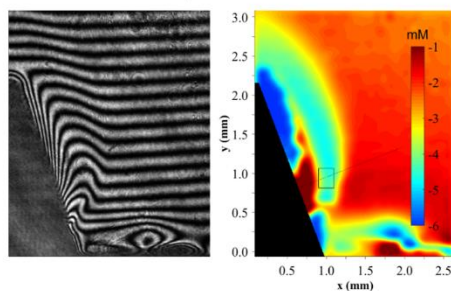

Figure S1.g. Copper deposition on Fe cone (45 Deg): Interferogram and variation of concentration of  $\text{CuSO}_4$  at time= 120.0s. Initial  $\text{CuSO}_4$  concentration=300 mM;  $J=0 \text{ mA/cm}^2$ .

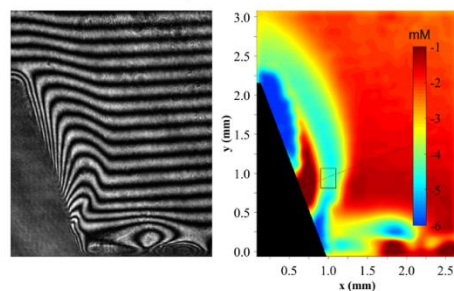

Figure S1.h. Copper deposition on Fe cone (45 Deg): Interferogram and variation of concentration of  $\text{CuSO}_4$  at time= 130.0s. Initial  $\text{CuSO}_4$  concentration=300 mM;  $J=0 \text{ mA/cm}^2$ .

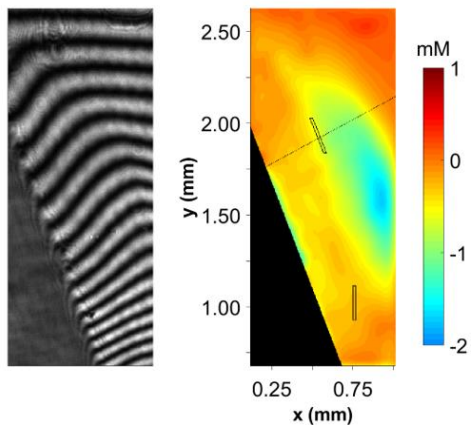

Figure S2.a. Copper electrodeposition on Fe cone (45 Deg): Interferogram and variation of concentration of  $\text{CuSO}_4$  at time= 38.0s. Initial  $\text{CuSO}_4$  concentration=300 mM;  $J=4.0 \text{ mA/cm}^2$ .

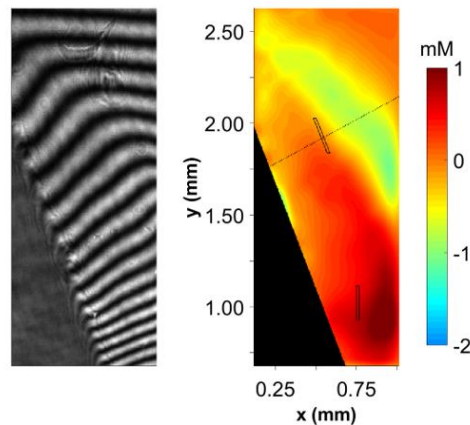

Figure S2.b. Copper electrodeposition on Fe cone (45 Deg): Interferogram and variation of concentration of  $\text{CuSO}_4$  at time= 40.0s. Initial  $\text{CuSO}_4$  concentration=300 mM;  $J=4.0 \text{ mA/cm}^2$ .

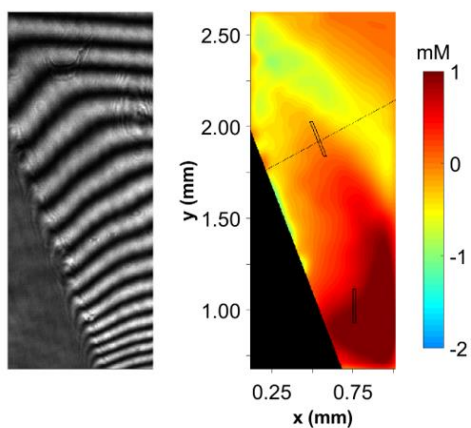

Figure S2.c. Copper electrodeposition on Fe cone (45 Deg): Interferogram and variation of concentration of  $\text{CuSO}_4$  at time= 41.0s. Initial  $\text{CuSO}_4$  concentration=300 mM;  $J=4.0 \text{ mA/cm}^2$ .

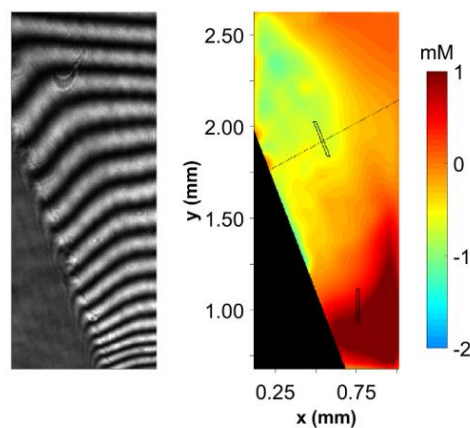

Figure S2.d. Copper electrodeposition on Fe cone (45 Deg): Interferogram and variation of concentration of  $\text{CuSO}_4$  at time= 42.0s. Initial  $\text{CuSO}_4$  concentration=300 mM;  $J=4.0 \text{ mA/cm}^2$ .

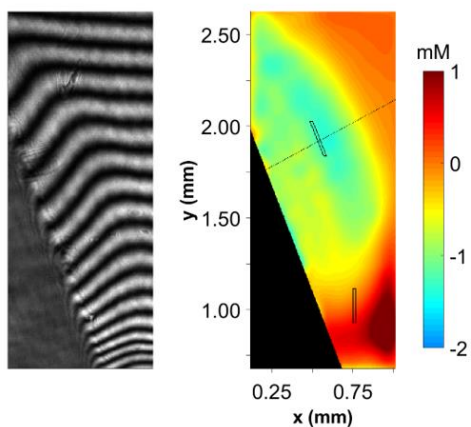

Figure S2.e. Copper electrodeposition on Fe cone (45 Deg): Interferogram and variation of concentration of  $\text{CuSO}_4$  at time= 43.0s. Initial  $\text{CuSO}_4$  concentration=300 mM;  $J=4.0 \text{ mA/cm}^2$ .

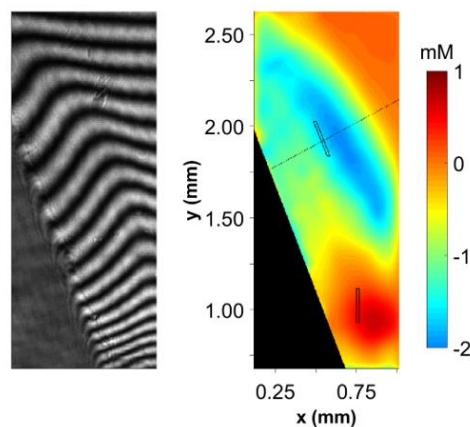

Figure S2.f. Copper electrodeposition on Fe cone (45 Deg): Interferogram and variation of concentration of  $\text{CuSO}_4$  at time= 45.0s. Initial  $\text{CuSO}_4$  concentration=300 mM;  $J=4.0 \text{ mA/cm}^2$ .

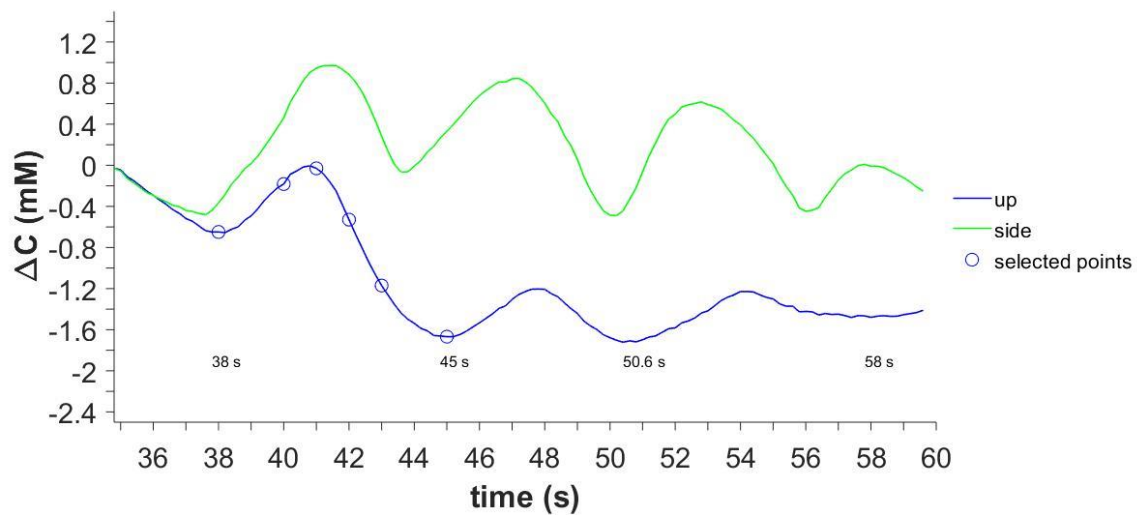

Figure S2.g. Case  $4.0 \text{ mA/cm}^2$ . Average of concentration variation in 2 rectangular ROIs  $0.02 \times 0.19 \text{ mm}$ . Position coordinates (mm):  $[x_1=0.52; z_1=1.93]; [x_2=0.8; z_2=1.02]$ ; period of oscillation:  $6.67 \pm 0.95 \text{ s}$
